# Supplementary material for: Femtosecond laser optimization of PEEK: efficient bioactivity achieved by synergistic surface chemistry and structures
Source: Royal Society of Chemistry journal article supplement (doi:10.1039/d2tb01142e), 2022-01-01
Supplement: d2tb01142e1.pdf [file d2tb01142e1.pdf]

## *Supporting Information*

### **Femtosecond Laser Optimization of PEEK: Efficient Bioactivity Achieved by Synergistic Surface Chemistry and Structures**

Fengxiong Luo<sup>a</sup>, Ruiqi Mao<sup>c</sup>, Yawen Huang<sup>a</sup>, Ling Wang<sup>a</sup>, Yixiang Lai<sup>a</sup>, Xiangdong Zhu<sup>a, b</sup>,  
Yujiang Fan<sup>a</sup>, Kefeng Wang<sup>a, b, \*</sup>, and Xingdong Zhang<sup>a, b</sup>

<sup>a</sup> National Engineering Research Center for Biomaterials, Sichuan University,  
Chengdu 610064, China

<sup>b</sup> Research Center for Material Genome Engineering, Sichuan University,  
Chengdu 610064, China

<sup>c</sup> College of Materials Science and Engineering, Sichuan University,  
Chengdu 610064, China

\*Corresponding author: KF Wang, [fencal@scu.edu.cn](mailto:fencal@scu.edu.cn)

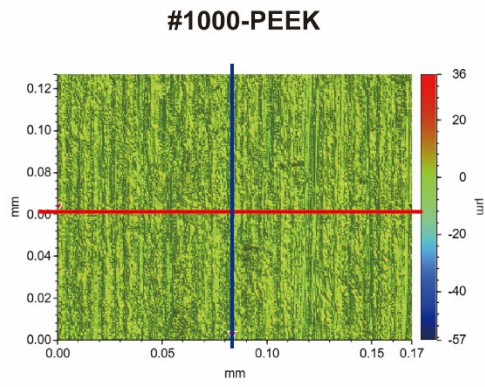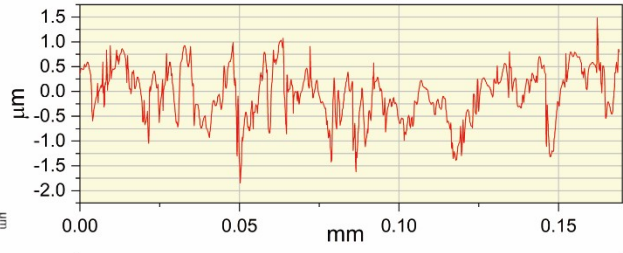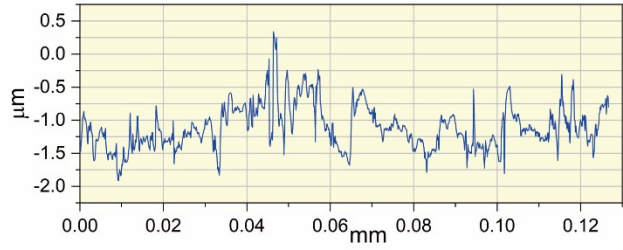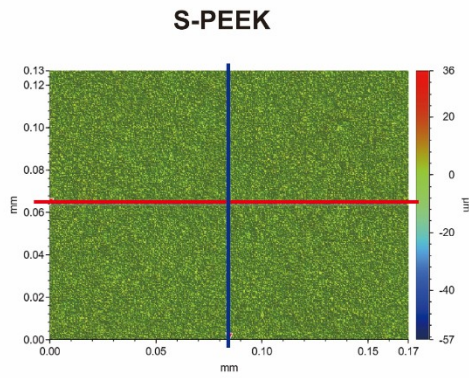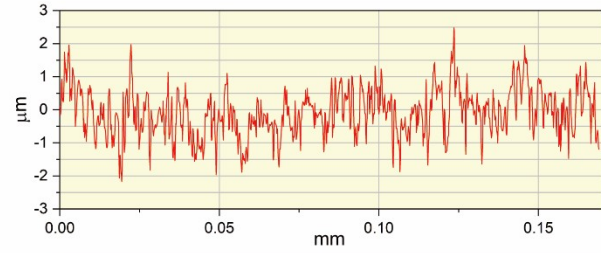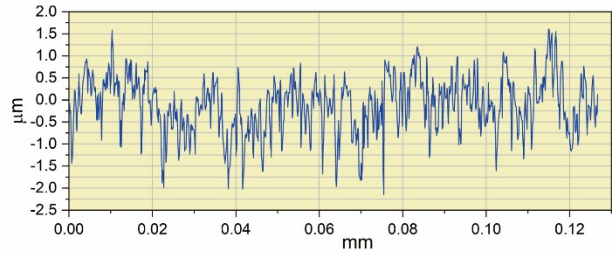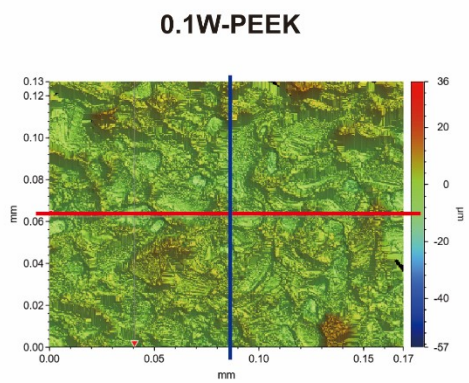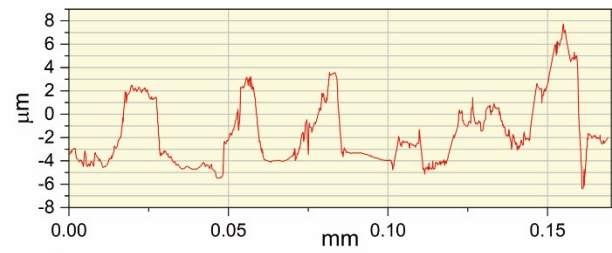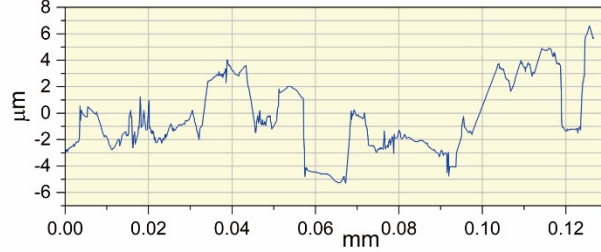

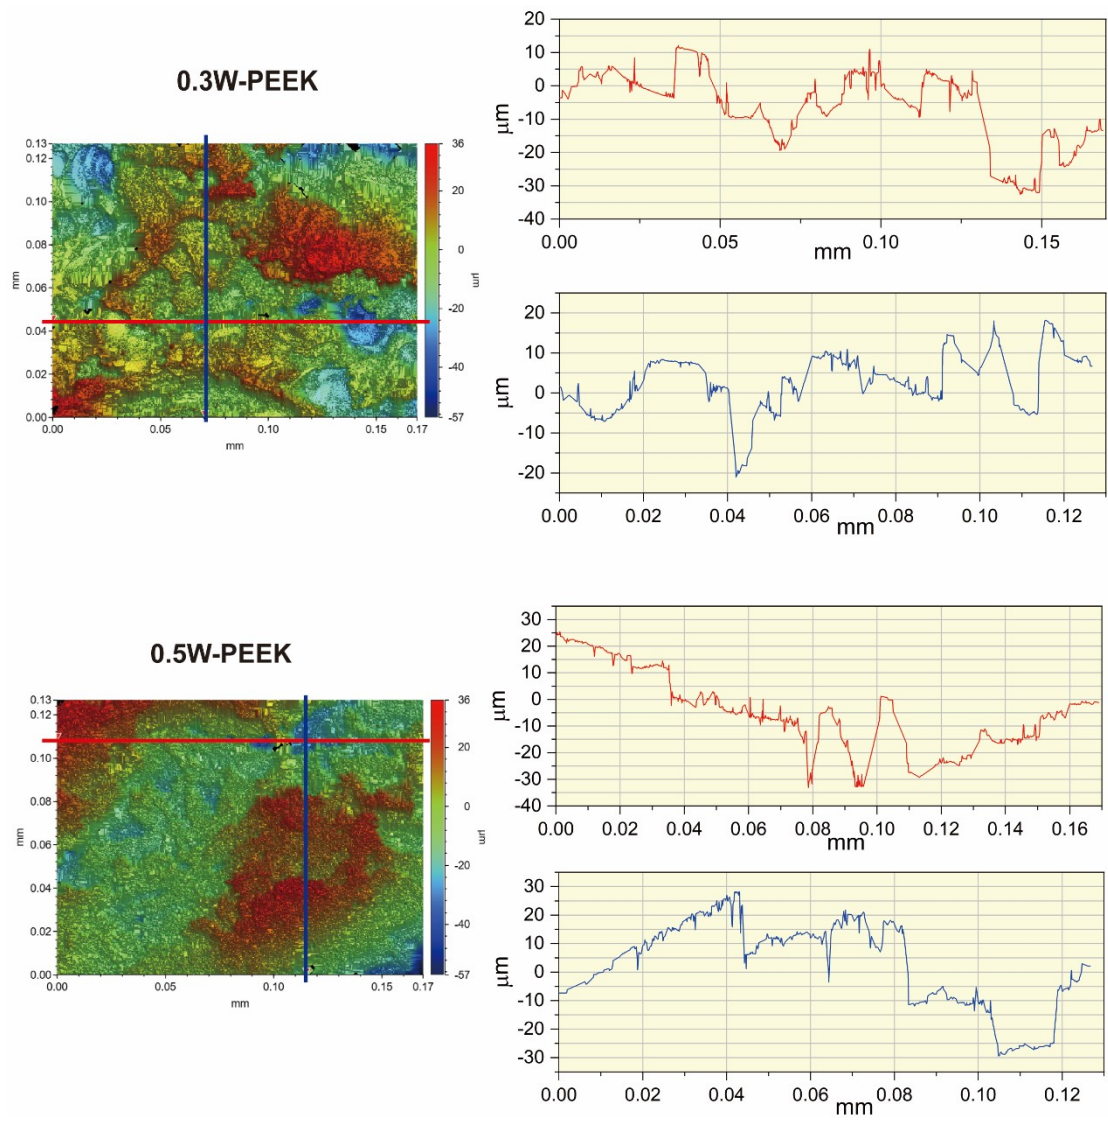

**Figure S1.** Sample ridge shape profiles and depth acquired from optical profilometry.

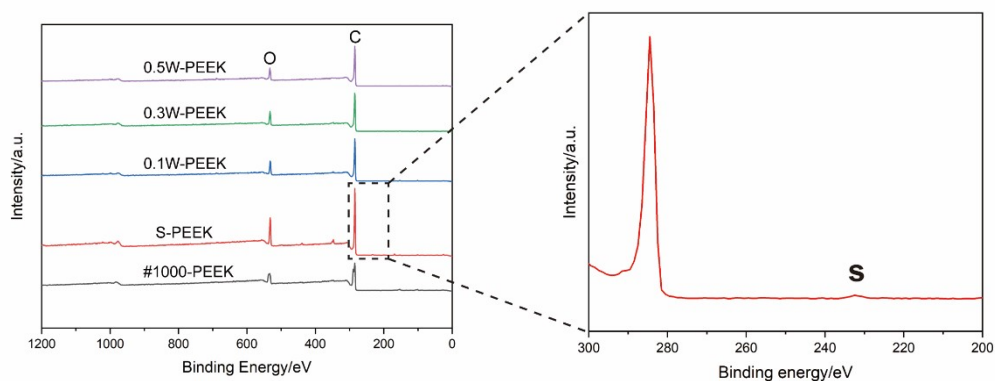

**Figure S2.** XPS spectra of the S-PEEK samples with local magnification

**Table S1** The bond dissociation energies (BDE) of C-C single bond and C-O single bond in PEEK

| Structure                                                                           | Solvent | BDE (kJ/mol) | Method | Ref.             |
|-------------------------------------------------------------------------------------|---------|--------------|--------|------------------|
| 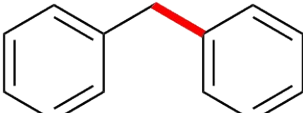 | Gas     | 91.7±2       | Der.   | 86P <sup>1</sup> |
|  | Gas     | 78.1±1       | Der.   | 86P <sup>1</sup> |

\*Der. (Derivation from standard molar enthalpy of formation)

\* The relevant data and results in the table are obtained from internet Bond-energy Databank (iBonD 2.0 Version). The detailed URL is as follows:  
<http://ibond.nankai.edu.cn/>

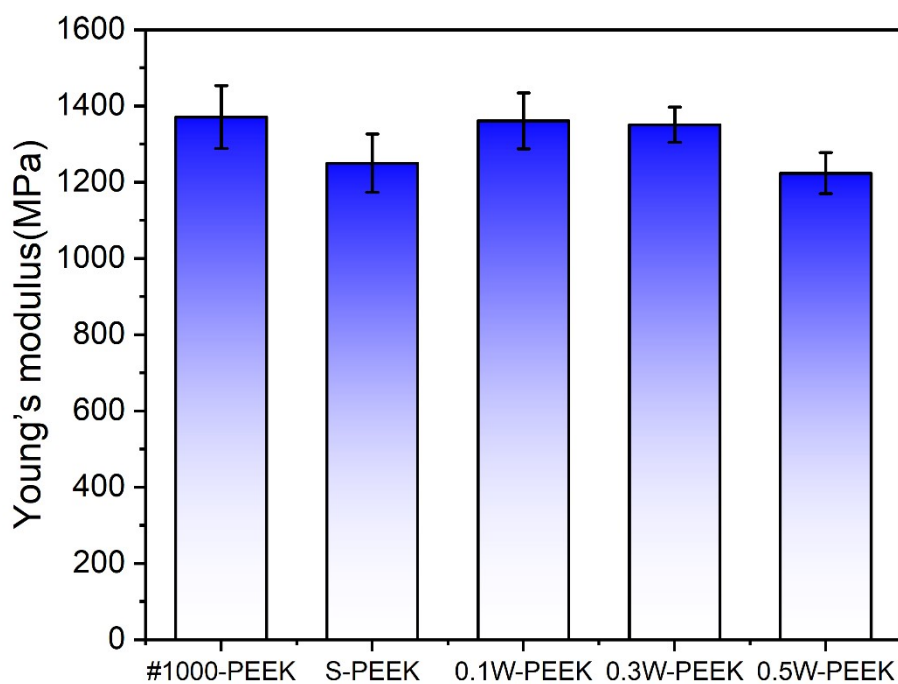

**Figure S3.** Young's modulus of PEEK surfaces after modifications were measured by Universal material Testing Machine. The results show that FSL has little effect on the mechanical properties of PEEK surfaces.

## References

- (1) Pedley, J. B.; Naylor, R. D.; Kirby, S. P. Thermochemical Data of Organic Compounds. *Chapman Hall* **1986**.
